# Supplementary material
Source: PubMed Central journal article supplement (PMC10023381)
Supplement: NIHMS1864695-supplement-2.pdf [file NIHMS1864695-supplement-2.pdf]

# Disease Specific Survival (DSS)

## Swallowing M3-6

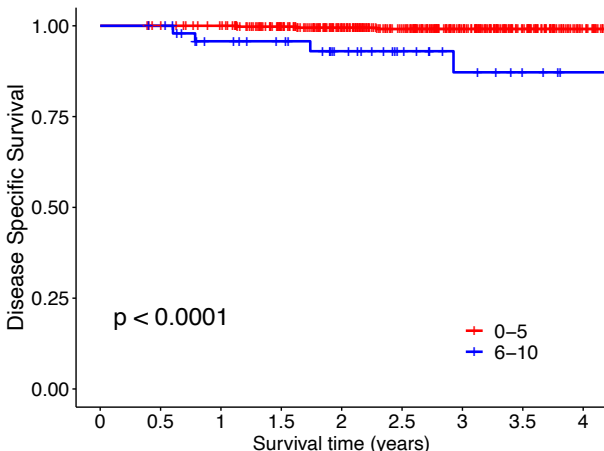

Number at risk

|      |     |     |     |     |     |     |     |     |    |
|------|-----|-----|-----|-----|-----|-----|-----|-----|----|
| 0-5  | 418 | 415 | 406 | 364 | 312 | 249 | 182 | 116 | 62 |
| 6-10 | 52  | 50  | 41  | 37  | 29  | 21  | 15  | 11  | 8  |
|      | 0   | 0.5 | 1   | 1.5 | 2   | 2.5 | 3   | 3.5 | 4  |

## Choking M3-6

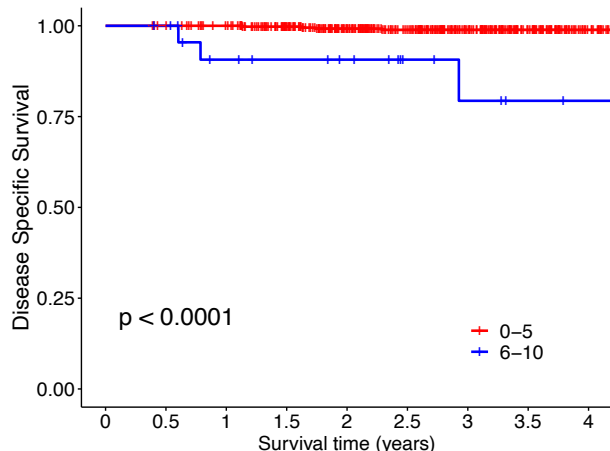

Number at risk

|      |     |     |     |     |     |     |     |     |    |
|------|-----|-----|-----|-----|-----|-----|-----|-----|----|
| 0-5  | 444 | 441 | 429 | 385 | 327 | 261 | 190 | 122 | 66 |
| 6-10 | 26  | 24  | 18  | 16  | 14  | 9   | 7   | 5   | 4  |
|      | 0   | 0.5 | 1   | 1.5 | 2   | 2.5 | 3   | 3.5 | 4  |

## Shortness-of-breath M3-6

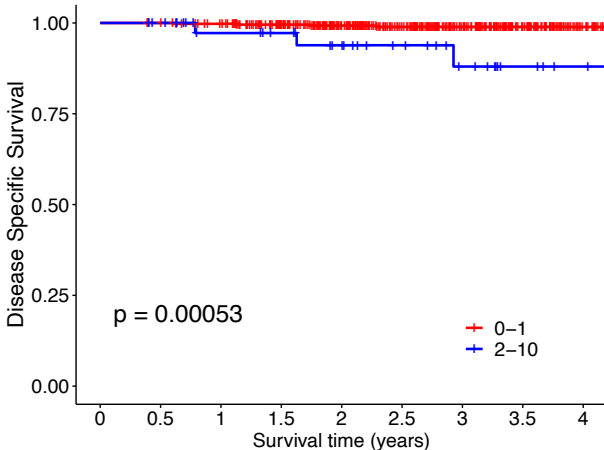

Number at risk

|      |     |     |     |     |     |     |     |     |    |
|------|-----|-----|-----|-----|-----|-----|-----|-----|----|
| 0-1  | 426 | 423 | 413 | 370 | 315 | 250 | 183 | 120 | 66 |
| 2-10 | 44  | 42  | 34  | 31  | 26  | 20  | 14  | 7   | 4  |
|      | 0   | 0.5 | 1   | 1.5 | 2   | 2.5 | 3   | 3.5 | 4  |

## Composite symptom M3-6

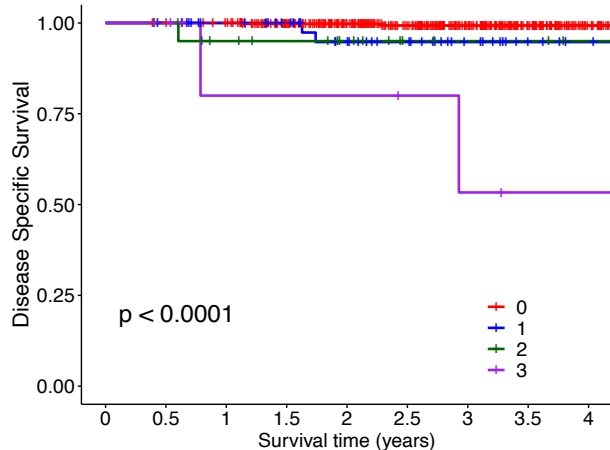

Number at risk

|   |     |     |     |     |     |     |     |     |    |
|---|-----|-----|-----|-----|-----|-----|-----|-----|----|
| 0 | 386 | 384 | 379 | 340 | 292 | 233 | 171 | 112 | 60 |
| 1 | 54  | 53  | 47  | 42  | 33  | 27  | 18  | 8   | 5  |
| 2 | 22  | 21  | 17  | 15  | 12  | 7   | 6   | 6   | 4  |
| 3 | 8   | 7   | 4   | 4   | 4   | 3   | 2   | 1   | 1  |
|   | 0   | 0.5 | 1   | 1.5 | 2   | 2.5 | 3   | 3.5 | 4  |
