# Supplementary material
Source: PubMed Central journal article supplement (PMC10023381)

A

## Swallowing

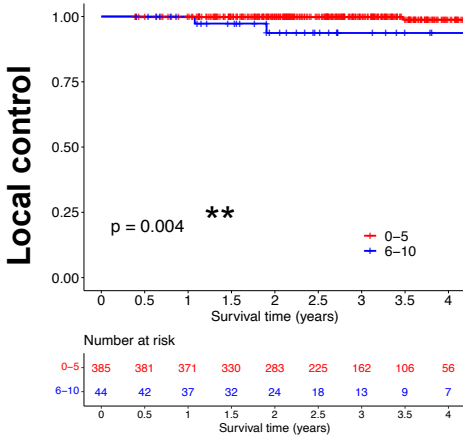

## Choking

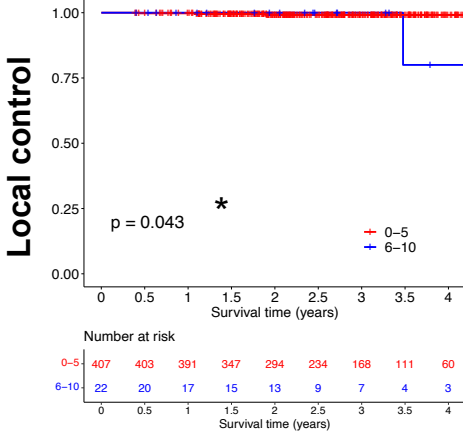

## Shortness-of-breath

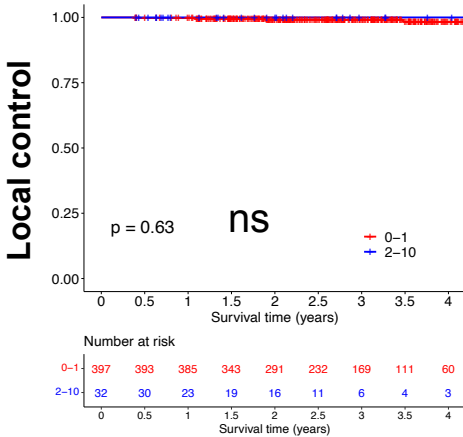

## Composite symptom

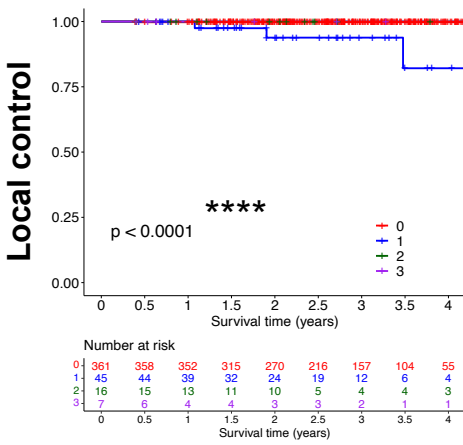

B

## Swallowing

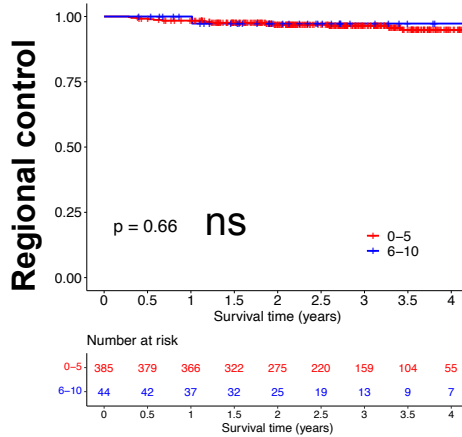

## Choking

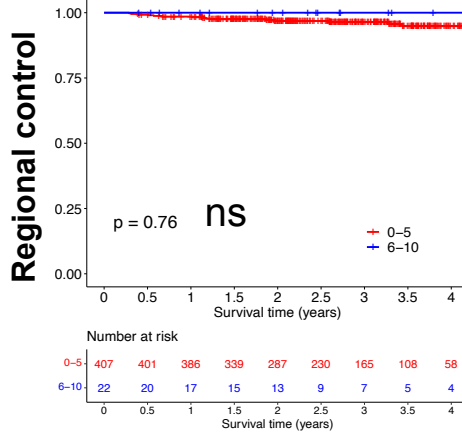

## Shortness-of-breath

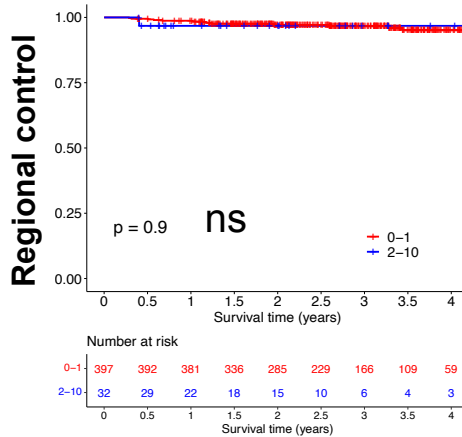

## Composite symptom

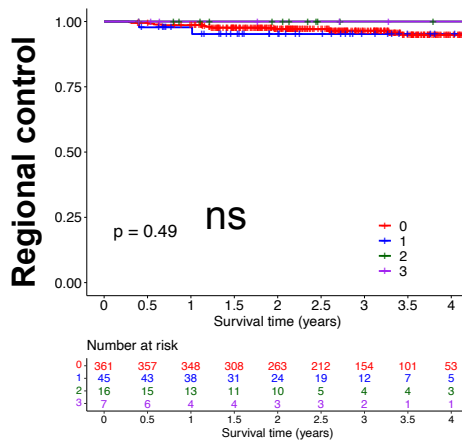

C

## Swallowing

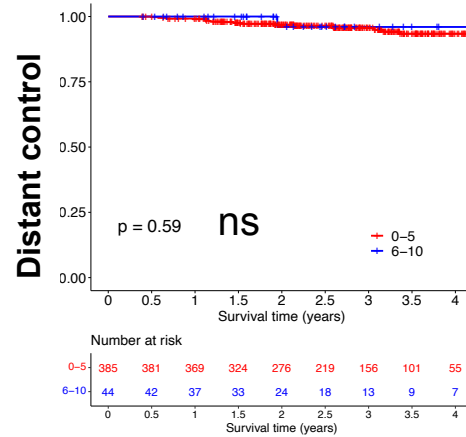

## Choking

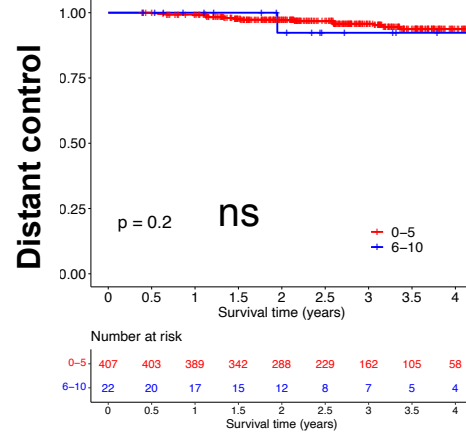

## Shortness-of-breath

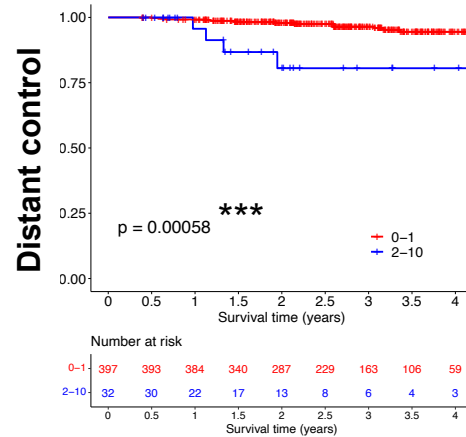

## Composite symptom

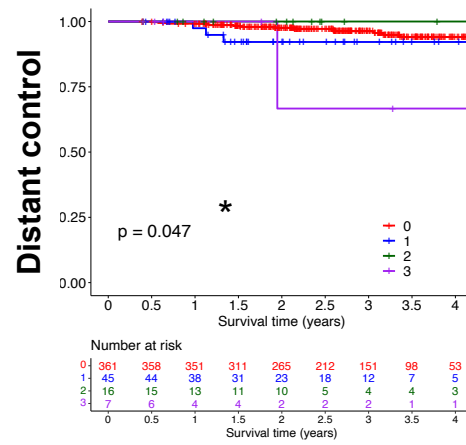

Supplement: NIHMS1864695-supplement-3.pdf [file NIHMS1864695-supplement-3.pdf]
