# Supplementary material
Source: PubMed Central journal article supplement (PMC10023381)

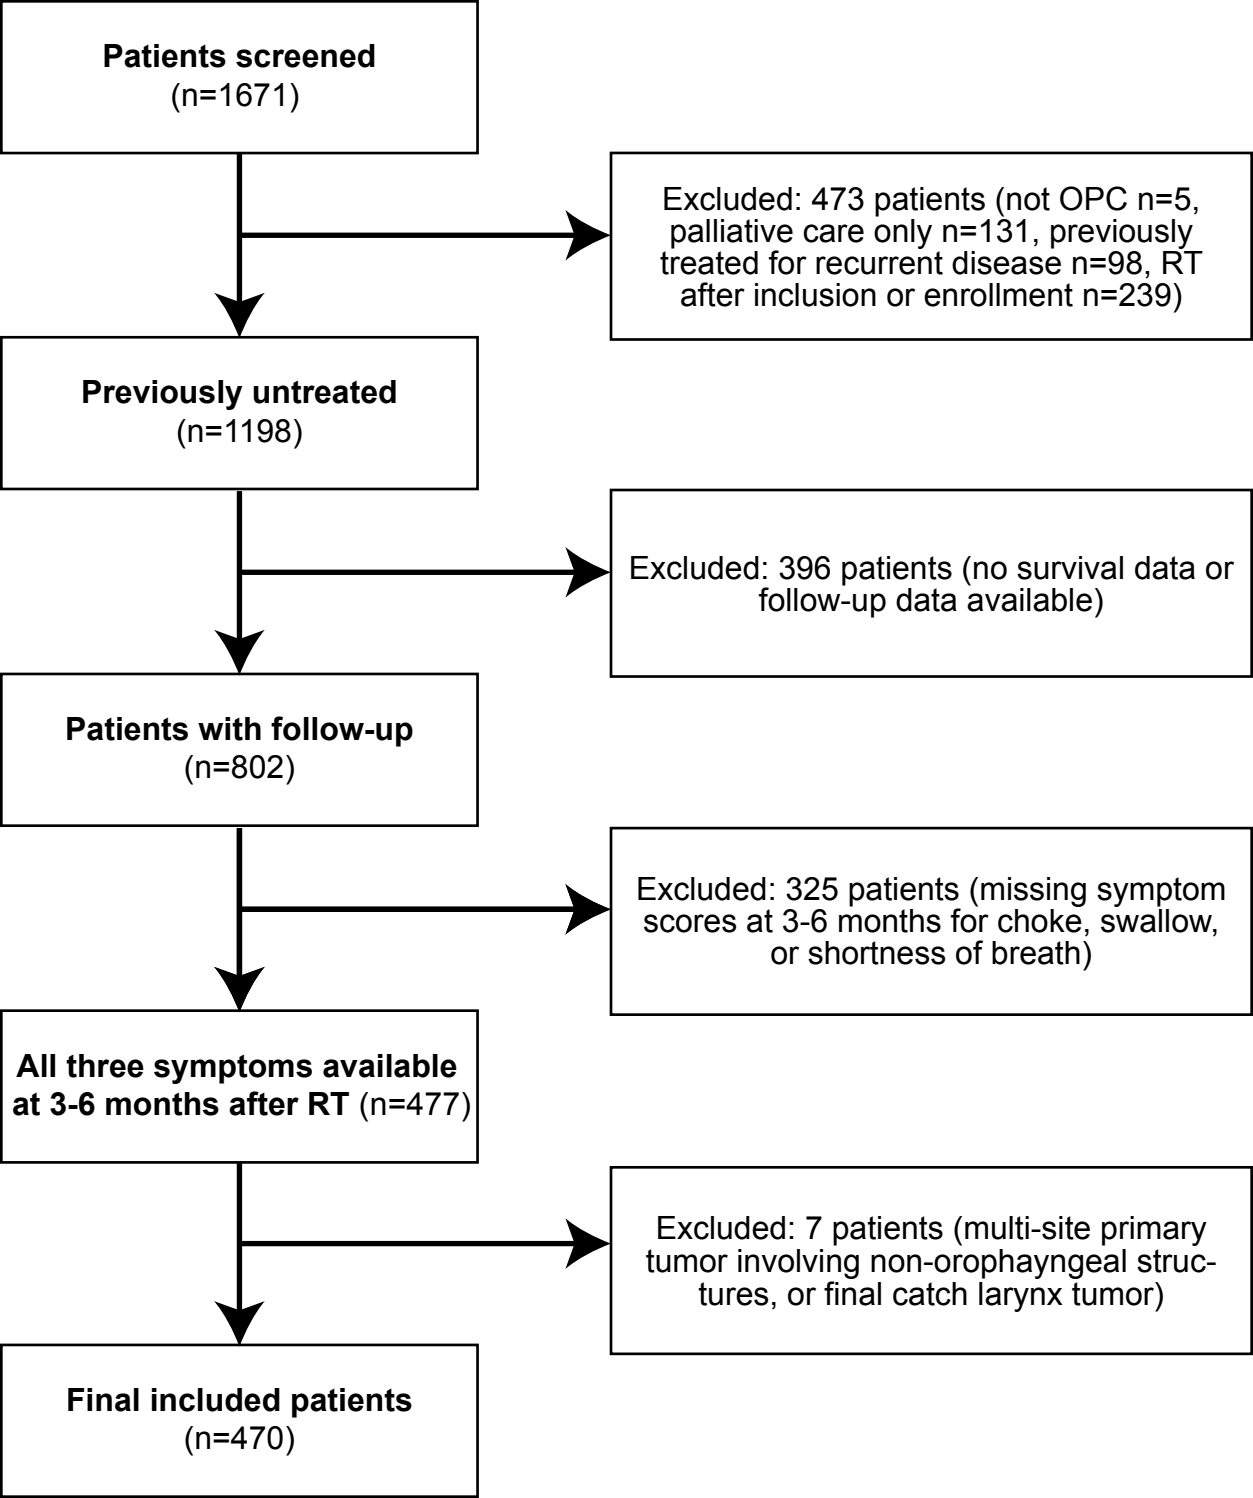

Supplement: NIHMS1864695-supplement-1.pdf [file NIHMS1864695-supplement-1.pdf]
